# Supplementary material
Source: HighWire-hosted journal article supplement (doi:10.1101/rna.049148.114)
Supplement: SuppLegends.docx [file SuppLegends.docx]

**Supplementary Material**

Exiqon miRNA LNA array data for miRNAs exhibiting differential expression in the whole dataset are listed inSupplementary Table 1a and between males (M) and females (F) are listed inSupplementary Table 1b. Correlations between miRNA normalized gene expressions by TaqMan are listed inSupplementary Table 2. Age distribution is shown in Supplementary Figure 1, PCA plot of microarray data is provided in Supplementary Figure 2, a Q-Q plot of Observed versus Expected p-values is provided in Supplementary Figure 3 and overrepresentation analysis for hsa-miR-29b predicted target sites is provided in Supplementary Figure 4. Supplementary Figure 5 depicts the Wnt/β-catenin signaling pathway for hsa-miR-29b analyzed for the overall dataset.
